# Supplementary material for: Iron uptake of etioplasts is independent from photosynthesis but applies the reduction-based strategy
Source: Front Plant Sci. 2023 Aug 11;14:1227811. doi: 10.3389/fpls.2023.1227811 (PMC10457162; doi:10.3389/fpls.2023.1227811)
Supplement: Supplementary file 2 [file Table_1.xlsx]

## Sheet: Sheet1
Blast results of identification of Arabidopsis sequences in Brassica oleracea. Arabidopsis thaliana protein and transcript sequences were accessed in NCBI database using the Araport IDs of the respective targets. Protein sequence blasts were performed against Brassica oleracea, and the returned best hits were used to access the corresponding transcript sequences. Reciprocal protein and nucleotide…
Gene	Araport ID	NCBI nucleotide accession	NCBI protein accession	blast query accession	target database	best hit accession(s)	Score	E value	Identity
ABCI8	AT4G04770.1	NM_116715.5	NP_192386.1	NP_192386.1	B. oleracea protein	XP_013611978.1 (XM_013756524.1)	1047	0	0.9106
				XP_013611978.1	A. thaliana protein	NP_192386.1	1037	0	0.9088
				XM_013756524.1	A. thaliana nucleotide	NM_116715.5	1356	0	0.8278
FRO7	AT5G49740.1	NM_124352.4	NP_199785.2	NP_199785.2	B. oleracea protein	XP_013611861.1 (XM_013756407.1)	1285	0	0.8554
				XP_013611861.1	A. thaliana protein	NP_199785.2	1294	0	0.8594
				XM_013756407.1	A. thaliana nucleotide	NM_124352.4	2375	0	0.8567
FER1	AT5G01600.1	NM_120238.4	NP_195780.1	NP_195780.1	B. oleracea protein	XP_013628626.1 (XM_013773172.1)	440	3e-158	0.8494
				XP_013628626.1	A. thaliana protein	NP_195780.1	434	2e-155	0.861
				XM_013773172.1	A. thaliana nucleotide	NM_120238.4	893	0	0.8758
PIC1	AT2G15290.1	NM_127089.4	NP_565372.1	NP_565372.1	B. oleracea protein	XP_013593672.1 (XM_013738218.1)	488	4e-176	0.851
				XP_013593672.1	A. thaliana protein	NP_565372.1	488	6e-176	0.851
				XM_013738218.1	A. thaliana nucleotide	NM_127089.4	876	0	0.8596
FPN3	AT5G26820.1	NM_122564.5	NP_198034.2	NP_198034.2	B. oleracea protein	XP_013612813.1 (XM_013757359.1)	1063	0	0.895
				XP_013612813.1	A. thaliana protein	NP_198034.2	1063	0	0.895
				XM_013757359.1	A. thaliana nucleotide	NM_122564.5	2093	0	0.8684
MFL1	AT5G42130.1	NM_123578.4	NP_199028.1	NP_199028.1	B. oleracea protein	XP_013637951.1 (XM_013782497.1)	642	0	0.8108
				XP_013637951.1	A. thaliana protein	NP_199028.1	641	0	0.8108
				XM_013782497.1	A. thaliana nucleotide	NM_123578.4	1001	0	0.7716
ABCI11	AT5G14100.1	NM_121413.2	NP_196914.1	NP_196914.1	B. oleracea protein	XP_013607031.1 (XM_013751577.1)	475	3e-171	0.8992
				XP_013607031.1	A. thaliana protein	NP_196914.1	476	2e-171	0.8993
				XM_013751577.1	A. thaliana nucleotide	NM_121413.2	1193	0	0.8693
NEET	AT5G51720.1	NM_124551.5	NP_568764.1	NP_568764.1	B. oleracea protein	XP_013609310.1 (XM_013753856.1)	191	2e-64	0.8716
				XP_013609310.1	A. thaliana protein	NP_568764.1	191	4e-64	0.8716
				XM_013753856.1	A. thaliana nucleotide	NM_124551.5	407	6e-111	0.838
YSL4	AT5G41000.1	NM_123465.4	NP_198916.2	NP_198916.2	B. oleracea protein	XP_013631970.1 (XM_013776516.1)	1158	0	0.8472
				XP_013631970.1	A. thaliana protein	NP_198916.2	1177	0	0.8546
				XM_013776516.1	A. thaliana nucleotide	NM_123465.4	2494	0	0.871
YSL6	AT3G27020.1	NM_113616.3	XP_013612045.1	XP_013612045.1	B. oleracea protein	XP_013612045.1 (XM_013756591.1)	1292	0	0.9397
				XP_013612045.1	A. thaliana protein	XP_013612045.1	1292	0	0.9397
				XM_013756591.1	A. thaliana nucleotide	NM_113616.3	2528	0	0.8406
TUB4	AT5G44340.1	NM_123801.2	NP_199247.1	NP_199247.1	B. oleracea protein	XP_013612217.1 (XM_013756763.1)	924	0	0.9887
				XP_013612217.1	A. thaliana protein	NP_199247.1	924	0	0.9887
				XM_013756763.1	A. thaliana nucleotide	NM_123801.2	1900	0	0.8681
EF1α	AT1G07940.1	NM_001331742.1	NP_001320768.1	NP_001320768.1	B. oleracea protein	XP_013586115.1 (XM_013730661.1)	923	0	0.9933
				XP_013586115.1	A. thaliana protein	NP_001320768.1	923	0	0.9933
				XM_013730661.1	A. thaliana nucleotide	NM_001331742.1	2150	0	0.8934
18s RNA	AT3G41768.1	NR_141642.1	-	NR_141642.1	B. oleracea nucleotide	KT377451.1	3170	0	0.9895
				KT377451.1	A. thaliana nucleotide	NR_141642.1	3170	0	0.9884
